# Supplementary material for: Pregnancy glycaemia and cord-blood levels of insulin and leptin in Pakistani and white British mother–offspring pairs: findings from a prospective pregnancy cohort
Source: PubMed Central journal article supplement (PMC4218974; doi:10.1007/s00125-014-3386-6), 2014-10-03

**eFigure 2a: Association of maternal gestational postload glucose with infant cord-blood insulin in White British (N = 629) and Pakistani (N = 786) mother-infant pairs.**

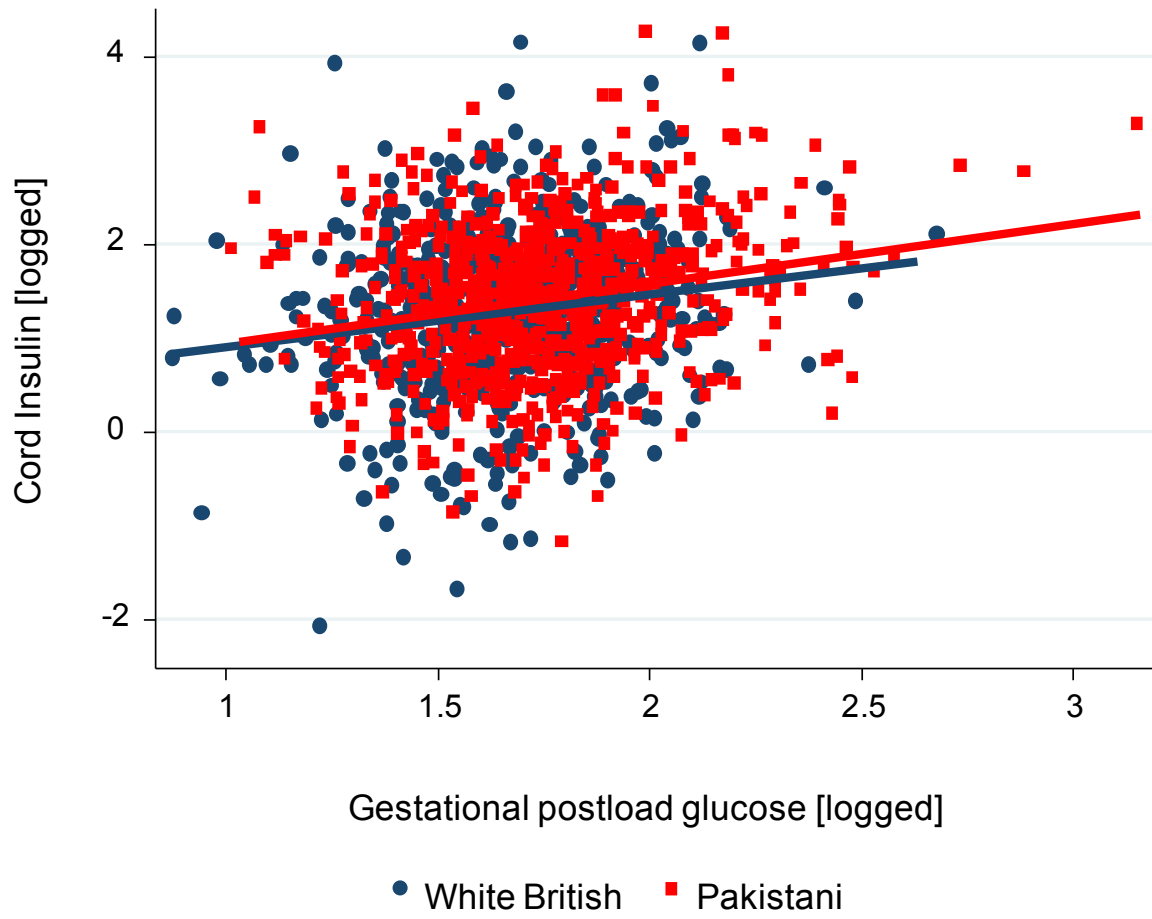

**eFigure 2b: Association of maternal gestational postload glucose with infant cord-blood leptin in White British (N = 629) and Pakistani (N = 786) mother-infant pairs.**

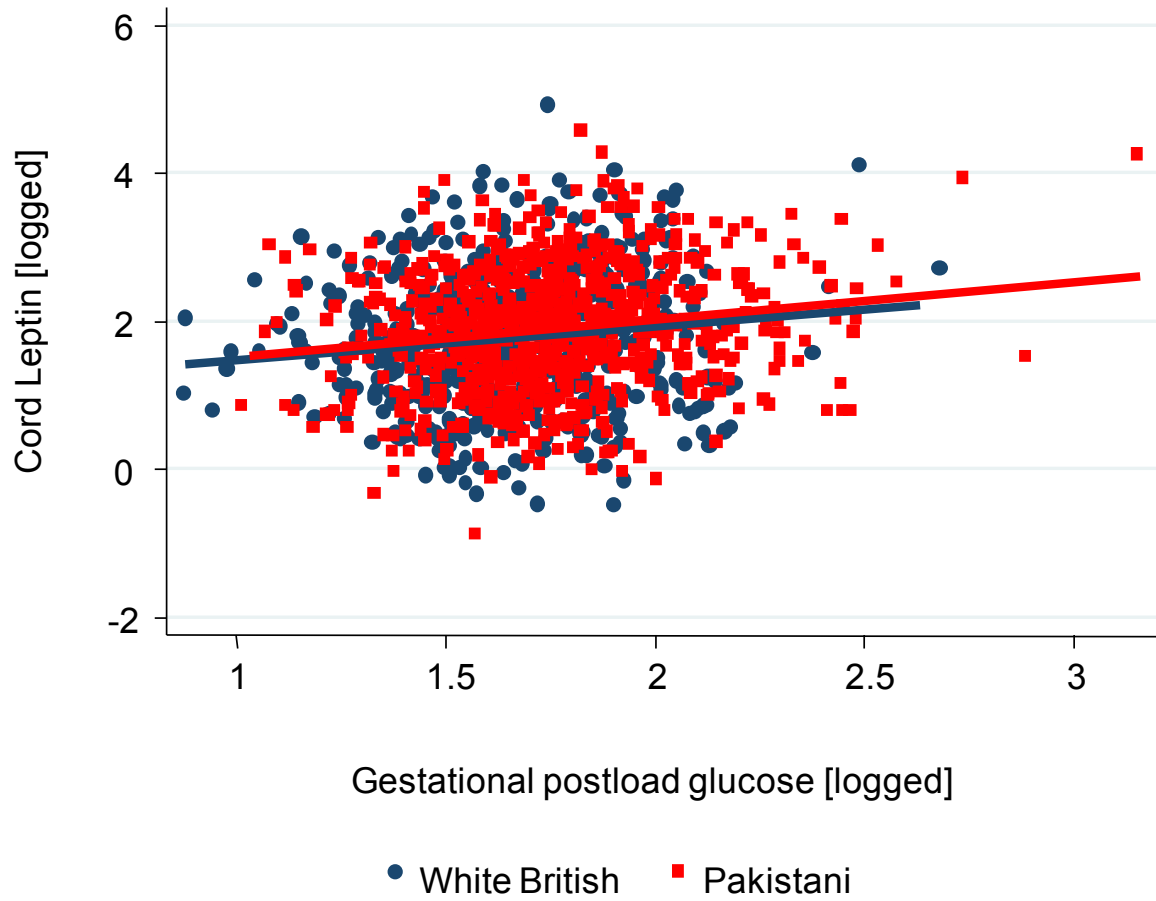

Supplement: 125_2014_3386_MOESM3_ESM.pdf [file 125_2014_3386_MOESM3_ESM.pdf]
